# Supplementary material
Source: PubMed Central journal article supplement (PMC8968046)
Supplement: mmc1.pdf [file mmc1.pdf]

**iScience, Volume 25**

**Supplemental information**

**Detection of SARS-CoV-2 with**

**RAPID: A prospective cohort study**

**Marcelo D.T. Torres, Lucas F. de Lima, André L. Ferreira, William R. de Araujo, Paul Callahan, Antonio Dávila Jr., Benjamin S. Abella, and Cesar de la Fuente-Nunez**

## Supplementary Information

**Table S1.** Diagnosis of anterior nares samples from an ambulatory COVID-19 testing site for the general public, led by staff at the Penn Presbyterian Medical Center (PPMC) using RAPID.

**Table S2.** RT-PCR panel primers and probes.

| Name           | Description                 | Oligonucleotide Sequence                           |
|----------------|-----------------------------|----------------------------------------------------|
| 2019-nCoV_N1-F | 2019-nCoV_N1 Forward Primer | 5'-GAC CCC AAA ATC AGC GAA AT-3'                   |
| 2019-nCoV_N1-R | 2019-nCoV_N1 Reverse Primer | 5'-TCT GGT TAC TGC CAG TTG AAT CTG-3'              |
| 2019-nCoV_N1-P | 2019-nCoV_N1 Probe          | 5'-FAM-ACC CCG CAT TAC GTT TGG TGG ACC-BHQ1-3'     |
| 2019-nCoV_N2-F | 2019-nCoV_N2 Forward Primer | 5'-TTA CAA ACA TTG GCC GCA AA-3'                   |
| 2019-nCoV_N2-R | 2019-nCoV_N2 Reverse Primer | 5'-GCG CGA CAT TCC GAA GAA-3'                      |
| 2019-nCoV_N2-P | 2019-nCoV_N2 Probe          | 5'-FAM-ACA ATT TGC CCC CAG CGC TTC AG-BHQ1-3'      |
| RP-F           | RNase P Forward Primer      | 5'-AGA TTT GGA CCT GCG AGC G-3'                    |
| RP-R           | RNase P Reverse Primer      | 5'-GAG CGG CTG TCT CCA CAA GT-3'                   |
| RP-P           | RNase P Probe               | 5'-FAM – TTC TGA CCT GAA GGC TCT GCG CG – BHQ-1-3' |

TaqMan® probes are labeled at the 5'-end with the reporter molecule 6-carboxyfluorescein (FAM) and with the quencher, Black Hole Quencher 1 (BHQ-1) (Biosearch Technologies, Inc., Novato, CA) at the 3'-end.
